# Supplementary material for: ‘S’-shaped curve: modelling trends in smoking prevalence, uptake and cessation in Great Britain from 1973 to 2016
Source: PubMed Central journal article supplement (PMC6824614; doi:10.1136/thoraxjnl-2018-212740), 2019-08-07

**Supplementary Table 1: Results of the autoregression analysis**

| Smoking prevalence |          |                 | Ever smoking prevalence (18-24 year olds) |          |                 | Regular ex-smoking prevalence |          |                 | Quit ratios |          |                 |
|--------------------|----------|-----------------|-------------------------------------------|----------|-----------------|-------------------------------|----------|-----------------|-------------|----------|-----------------|
| DW                 | <i>p</i> | Autocorrelation | DW                                        | <i>p</i> | Autocorrelation | DW                            | <i>p</i> | Autocorrelation | DW          | <i>p</i> | Autocorrelation |
| 0.393              | <0.001   | AR(1)           | 0.413                                     | <0.001   | AR(1)           | 0.205                         | <0.001   | AR(1)           | 0.334       | <0.001   | AR(1)           |

*Note:* DW=Durbin-Watson statistics; PACF=partial autocorrelation function; ACF=autocorrelation function; AR=autoregressive autocorrelation; MA=moving average autocorrelation; DW only tests for lag-1 AR autocorrelation; the PACF and ACF were used to assess MA(1), MA(2) and AR(2).

Supplementary Table 2: Indices of fit for the regression models (not accounting for autocorrelation)

| Model                                   | Smoking prevalence |       |                     | Ever smoking prevalence (18-24 years old) |       |                     | Regular ex-smoking prevalence |       |                     | Quit ratios |       |                     |
|-----------------------------------------|--------------------|-------|---------------------|-------------------------------------------|-------|---------------------|-------------------------------|-------|---------------------|-------------|-------|---------------------|
|                                         | AIC                | BIC   | Adj. R <sup>2</sup> | AIC                                       | BIC   | Adj. R <sup>2</sup> | AIC                           | BIC   | Adj. R <sup>2</sup> | AIC         | BIC   | Adj. R <sup>2</sup> |
| Linear trend model                      | 123.2              | 127.5 | 0.96                | 158.4                                     | 162.7 | 0.88                | 138.1                         | 142.4 | 0.23                | 154.2       | 158.5 | 0.90                |
| Quadratic trend model                   | 113.7              | 119.4 | 0.97                | 151.9                                     | 157.6 | 0.91                | 108.4                         | 114.2 | 0.71                | 147.8       | 153.6 | 0.92                |
| Cubic trend model                       | 83.2               | 90.3  | 0.99                | 131.8                                     | 139.0 | 0.95                | 73.3                          | 80.5  | 0.91                | 114.6       | 121.7 | 0.97                |
| Logarithmic trend model                 | 150.4              | 154.7 | 0.91                | 186.1                                     | 190.4 | 0.71                | 119.8                         | 124.1 | 0.57                | 153.0       | 157.3 | 0.91                |
| Exponential trend model                 | 111.5              | 115.8 | 0.97                | 167.3                                     | 171.6 | 0.85                | 142.5                         | 146.8 | 0.26                | 172.8       | 177.1 | 0.86                |
| Power trend model                       | 168.4              | 172.7 | 0.81                | 195.4                                     | 199.8 | 0.62                | 121.7                         | 126.0 | 0.62                | 136.5       | 140.8 | 0.96                |
| Linear piecewise trend model (1BP)      | 94.6               | 101.7 | 0.99                | 139.1                                     | 146.3 | 0.94                | 81.4                          | 88.6  | 0.88                | 133.2       | 140.4 | 0.95                |
| Linear piecewise trend model (2BP)      | 86.0               | 96.1  | 0.99                | 104.9                                     | 114.9 | 0.98                | 60.0                          | 70.1  | 0.94                | 112.7       | 122.8 | 0.98                |
| Quadratic piecewise trend model (1BP)   | 79.0               | 86.1  | 0.99                | 117.4                                     | 124.6 | 0.97                | 67.9                          | 75.1  | 0.92                | 109.6       | 116.7 | 0.98                |
| Quadratic piecewise trend model (2BP)   | 74.8               | 83.4  | 0.99                | 98.8                                      | 107.4 | 0.98                | 51.6                          | 60.2  | 0.96                | 103.0       | 111.6 | 0.98                |
| Cubic piecewise trend model (1BP)       | 83.9               | 92.5  | 0.99                | 106.4                                     | 115.0 | 0.98                | 57.9                          | 66.5  | 0.95                | 109.1       | 117.7 | 0.98                |
| Cubic piecewise trend model (2BP)       | 80.8               | 90.8  | 0.99                | 102.0                                     | 112.0 | 0.98                | 56.4                          | 66.4  | 0.95                | 108.7       | 118.7 | 0.98                |
| Logarithmic piecewise trend model (1BP) | 109.2              | 116.4 | 0.98                | 108.6                                     | 115.7 | 0.98                | 86.0                          | 93.2  | 0.87                | 142.5       | 149.7 | 0.94                |
| Logarithmic piecewise trend model (2BP) | 79.5               | 89.5  | 0.99                | 101.4                                     | 111.4 | 0.98                | 81.8                          | 91.9  | 0.89                | 117.9       | 127.9 | 0.97                |
| Exponential piecewise trend model (1BP) | 100.0              | 107.2 | 0.98                | 12.07                                     | 134.2 | 0.96                | 82.0                          | 89.2  | 0.9                 | 127.3       | 134.4 | 0.97                |
| Exponential piecewise trend model (2BP) | 80.9               | 90.9  | 0.99                | 101.4                                     | 111.5 | 0.98                | 64.7                          | 74.7  | 0.95                | 116.4       | 126.4 | 0.98                |
| Power trend piecewise model (1BP)       | 119.0              | 101.7 | 0.97                | 139.1                                     | 111.1 | 0.98                | 81.7                          | 88.9  | 0.9                 | 122.6       | 129.7 | 0.97                |
| Power trend piecewise model (2BP)       | 95.6               | 96.1  | 0.99                | 104.9                                     | 120.7 | 0.99                | 64.8                          | 74.9  | 0.95                | 126.9       | 136.9 | 0.97                |

Note: Blue indicates the selected model out of all possible models

**Supplementary Table 3: Interpretation of the coefficients from the assessed models**

| <b>Model</b>                           | <b>Coefficient</b>           | <b>Interpretation</b>                                                                                                                                                                                                                                                                                                                                                                                           |
|----------------------------------------|------------------------------|-----------------------------------------------------------------------------------------------------------------------------------------------------------------------------------------------------------------------------------------------------------------------------------------------------------------------------------------------------------------------------------------------------------------|
| Linear trend model                     | Intercept                    | Value of the dependent variable at the start of the series                                                                                                                                                                                                                                                                                                                                                      |
|                                        | Time                         | Linear slope between time and the dependent variable. If the sign is positive then the dependent variable increases as time increases, if the sign is negative then the dependent variable decreases as time increases.                                                                                                                                                                                         |
| Quadratic trend model                  | Intercept                    | Value of the dependent variable at the start of the series                                                                                                                                                                                                                                                                                                                                                      |
|                                        | Time                         | Rate of change in smoking prevalence at the start of the series                                                                                                                                                                                                                                                                                                                                                 |
|                                        | Time <sup>2</sup>            | The quadratic trend over the series. If the sign is positive then the model is convex (curvature is upwards) and if it is negative then the curve is concave (curvature is downwards).                                                                                                                                                                                                                          |
| Cubic trend model                      | Intercept                    | Value of the dependent variable at the start of the series                                                                                                                                                                                                                                                                                                                                                      |
|                                        | Time                         | Rate of change in smoking prevalence at the start of the series                                                                                                                                                                                                                                                                                                                                                 |
|                                        | Time <sup>2</sup>            | The quadratic trend over the series. If the sign is positive then the model is convex (curvature is upwards) and if it is negative then the curve is concave (curvature is downwards).                                                                                                                                                                                                                          |
|                                        | Time <sup>3</sup>            | The cubic trend over the time series. If negative then the quadratic trend is increasingly negative as time increases. If positive then the quadratic trend is increasingly positive as time increases.                                                                                                                                                                                                         |
| Linear piecewise trend model (1 BP)    | Intercept                    | Value of the dependent variable at the start of the series                                                                                                                                                                                                                                                                                                                                                      |
|                                        | Time 0 to BP1                | Linear slope between time and the dependent variable from baseline to BP1. If the sign is positive then the dependent variable increases as time increases, if the sign is negative then the dependent variable decreases as time increases                                                                                                                                                                     |
|                                        | Time BP2 to end              | Change in the linear slope between time and the dependent from BP1 to the end of the series. The linear term for this period is thus Time 0 to BP1 + Time BP2 to end                                                                                                                                                                                                                                            |
| Quadratic piecewise trend model (1 BP) | Intercept                    | Value of the dependent variable at the start of the series                                                                                                                                                                                                                                                                                                                                                      |
|                                        | Time                         | Rate of change in smoking prevalence at the start of the series                                                                                                                                                                                                                                                                                                                                                 |
|                                        | Time <sup>2</sup> 0 to BP1   | The quadratic trend between 0 and BP1. If the sign is positive then the model is convex (curvature is upwards) and if it is negative then the curve is concave (curvature is downwards).                                                                                                                                                                                                                        |
|                                        | Time <sup>2</sup> BP1 to end | The change in the quadratic trend between BP1 and the end of the series. The quadratic term for this period is thus Time <sup>2</sup> 0 to BP1+ Time <sup>2</sup> BP1 to end. The linear term for this period is thus Time 0 to BP1 + Time BP2 to end                                                                                                                                                           |
| Cubic piecewise trend model (1 BP)     | Intercept                    | Value of the dependent variable at the start of the series                                                                                                                                                                                                                                                                                                                                                      |
|                                        | Time                         | Rate of change in smoking prevalence at the start of the series                                                                                                                                                                                                                                                                                                                                                 |
|                                        | Time <sup>2</sup>            | The quadratic trend over the series. If the sign is positive then the model is convex (curvature is upwards) and if it is negative then the curve is concave (curvature is downwards).                                                                                                                                                                                                                          |
|                                        | Time <sup>3</sup> 0 to BP1   | The cubic trend between baseline and BP1. If negative then the quadratic trend is increasingly negative as time increases. The quadratic trend at smaller values of time is positive (linear slope gets more positive), while the quadratic trend at larger values of time is negative (linear slope gets more less positive). If positive then the quadratic trend is increasingly positive as time increases. |
|                                        | Time <sup>3</sup> BP1 to end | Change in the cubic trend between BP1 and the end of the series. The cubic term for this period is thus Time <sup>3</sup> 0 to BP1 + Time <sup>3</sup> BP1 to end.                                                                                                                                                                                                                                              |

Supplementary Table 4: Results of the linear model and best fitting standard regression models and piecewise regression models for the sample overall

|                                          | Smoking prevalence |        |        |        | Ever smoking prevalence (18-24 year olds) |        |        |        | Regular ex-smoking prevalence |        |        |        | Quit ratios |        |        |        |
|------------------------------------------|--------------------|--------|--------|--------|-------------------------------------------|--------|--------|--------|-------------------------------|--------|--------|--------|-------------|--------|--------|--------|
|                                          | $\beta$            | 95%CI  |        | P      | $\beta$                                   | 95%CI  |        | P      | $\beta$                       | 95%CI  |        | P      | B           | 95%CI  |        | P      |
|                                          |                    | Lower  | Upper  |        |                                           | Lower  | Upper  |        |                               | Lower  | Upper  |        |             | Lower  | Upper  |        |
| <b>Linear model</b>                      |                    |        |        |        |                                           |        |        |        |                               |        |        |        |             |        |        |        |
| <b>No autocorrelation</b>                |                    |        |        |        |                                           |        |        |        |                               |        |        |        |             |        |        |        |
| Intercept ( $B_0$ )                      | 43.520             | 42.225 | 44.816 | <0.001 | 55.906                                    | 53.520 | 58.192 | <0.001 | 21.411                        | 19.764 | 23.058 | <0.001 | 31.460      | 29.323 | 33.597 | <0.001 |
| Time ( $B_1$ )                           | -0.630             | -0.677 | -0.584 | <0.001 | -0.602                                    | -0.684 | -0.520 | <0.001 | 0.092                         | 0.033  | 0.151  | 0.003  | 0.628       | 0.552  | 0.705  | <0.001 |
| <b>Autocorrelation</b>                   |                    |        |        |        |                                           |        |        |        |                               |        |        |        |             |        |        |        |
| Intercept ( $B_0$ )                      | 47.479             | 32.902 | 62.057 | <0.001 | 57.520                                    | 47.447 | 67.592 | <0.001 | 16.353                        | -8.601 | 41.307 | 0.191  | 26.474      | 4.818  | 48.129 | 0.018  |
| Time ( $B_1$ )                           | -0.737             | -0.973 | -0.501 | <0.001 | -0.683                                    | -0.989 | -0.377 | <0.001 | 0.236                         | 0.011  | 0.460  | 0.040  | 0.818       | 0.461  | 1.174  | <0.001 |
| <b>Best fitting standard model</b>       |                    |        |        |        |                                           |        |        |        |                               |        |        |        |             |        |        |        |
| <b>No autocorrelation</b>                |                    |        |        |        |                                           |        |        |        |                               |        |        |        |             |        |        |        |
| Intercept ( $B_0$ )                      | 47.559             | 46.439 | 48.679 | <0.001 | 56.729                                    | 54.275 | 59.183 | <0.001 | 15.979                        | 15.023 | 16.934 | <0.001 | 24.902      | 23.044 | 26.760 | <0.001 |
| Time ( $B_1$ )                           | -1.619             | -1.849 | -1.389 | <0.001 | -1.375                                    | -1.880 | -0.871 | <0.001 | 1.265                         | 1.068  | 1.461  | <0.001 | 2.293       | 1.911  | 2.675  | <0.001 |
| Time <sup>2</sup> ( $B_2^2$ )            | 0.048              | 0.036  | 0.060  | <0.001 | 0.059                                     | 0.032  | 0.086  | <0.001 | -0.051                        | -0.061 | -0.040 | <0.001 | -0.083      | -0.103 | -0.062 | <0.001 |
| Time <sup>3</sup> ( $B_3^3$ )            | -0.001             | -0.001 | <0.001 | <0.001 | -0.001                                    | -0.001 | -0.001 | <0.001 | 0.001                         | <0.001 | 0.001  | <0.001 | 0.001       | 0.001  | 0.001  | <0.001 |
| <b>Autocorrelation</b>                   |                    |        |        |        |                                           |        |        |        |                               |        |        |        |             |        |        |        |
| Intercept ( $B_0$ )                      | 47.754             | 45.754 | 49.755 | <0.001 | 57.924                                    | 51.709 | 64.138 | <0.001 | 16.490                        | 11.748 | 21.232 | <0.001 | 25.597      | 18.453 | 32.742 | <0.001 |
| Time ( $B_1$ )                           | -1.668             | -2.075 | -1.260 | <0.001 | -1.561                                    | -2.657 | -0.464 | 0.007  | 1.277                         | 0.761  | 1.792  | <0.001 | 2.318       | 1.412  | 3.229  | <0.001 |
| Time <sup>2</sup> ( $B_2^2$ )            | 0.050              | 0.028  | 0.073  | <0.001 | 0.065                                     | 0.003  | 0.127  | 0.041  | -0.056                        | -0.085 | -0.027 | 0.001  | -0.090      | -0.142 | -0.039 | 0.001  |
| Time <sup>3</sup> ( $B_3^3$ )            | -0.001             | -0.001 | <0.001 | <0.001 | -0.001                                    | -0.002 | <0.001 | 0.028  | 0.001                         | <0.001 | 0.001  | 0.003  | 0.001       | 0.001  | 0.002  | 0.002  |
| <b>Best fitting piecewise model</b>      |                    |        |        |        |                                           |        |        |        |                               |        |        |        |             |        |        |        |
| <b>No autocorrelation</b>                |                    |        |        |        |                                           |        |        |        |                               |        |        |        |             |        |        |        |
| Intercept ( $B_0$ )                      | 47.384             | 46.458 | 48.310 | <0.001 | 57.722                                    | 56.295 | 59.149 | <0.001 | 16.450                        | 15.811 | 17.088 | <0.001 | 25.613      | 24.153 | 27.074 | <0.001 |
| Time ( $B_1$ )                           | -1.439             | -1.594 | -1.284 | <0.001 | -1.616                                    | -1.894 | -1.339 | <0.001 | 0.990                         | 0.884  | 1.096  | <0.001 | 1.838       | 1.596  | 2.079  | <0.001 |
| Time <sup>2</sup> 0 to BP1 ( $B_2^2$ )   | 0.026              | 0.020  | 0.031  | <0.001 | 0.050                                     | 0.039  | 0.061  | <0.001 | -0.025                        | -0.029 | -0.022 | <0.001 | -0.038      | -0.046 | -0.030 | <0.001 |
| Time <sup>2</sup> BP1 to BP2 ( $B_3^2$ ) | -0.359             | -0.534 | -0.184 | <0.001 | -0.168                                    | -0.203 | -0.133 | <0.001 | 0.026                         | 0.018  | 0.034  | <0.001 | 0.057       | 0.039  | 0.074  | <0.001 |
| Time <sup>2</sup> BP2 to BP3 ( $B_4^2$ ) | 0.337              | 0.151  | 0.523  | 0.001  | 0.140                                     | 0.096  | 0.185  | <0.001 | 0.227                         | 0.138  | 0.316  | <0.001 | 0.532       | 0.186  | 0.879  | 0.004  |
| <b>Autocorrelation</b>                   |                    |        |        |        |                                           |        |        |        |                               |        |        |        |             |        |        |        |
| Intercept ( $B_0$ )                      | 47.548             | 45.951 | 49.144 | <0.001 | 57.667                                    | 56.466 | 58.867 | <0.001 | 16.462                        | 15.637 | 17.287 | <0.001 | 25.573      | 22.698 | 28.448 | <0.001 |
| Time ( $B_1$ )                           | -1.456             | -1.719 | -1.193 | <0.001 | 1.608                                     | -1.840 | -1.376 | <0.001 | 0.989                         | 0.851  | 1.128  | <0.001 | 1.868       | 1.399  | 2.336  | <0.001 |
| Time <sup>2</sup> 0 to BP1 ( $B_2^2$ )   | 0.026              | 0.017  | 0.035  | <0.001 | 0.050                                     | 0.041  | 0.059  | <0.001 | -0.025                        | -0.030 | -0.021 | <0.001 | -0.039      | -0.055 | -0.023 | <0.001 |
| Time <sup>2</sup> BP1 to BP2 ( $B_3^2$ ) | -0.191             | -0.345 | -0.037 | 0.017  | -0.168                                    | -0.196 | -0.139 | <0.001 | 0.025                         | 0.015  | 0.036  | <0.001 | 0.059       | 0.023  | 0.095  | 0.002  |
| Time <sup>2</sup> BP2 to BP3 ( $B_4^2$ ) | 0.167              | 0.009  | 0.342  | 0.062  | 0.140                                     | 0.103  | 0.177  | <0.001 | 0.231                         | 0.124  | 0.338  | <0.001 | 0.527       | 0.080  | 0.975  | 0.023  |

**Note:** Smoking prevalence: best fitting standard regression model = cubic model (with point of inflection identified by second order derivatives in 1989 (year 16)), best fitting piecewise model = quadratic model with two breakpoints in 2000 (year 27) and 2001 (year 28); Ever smoking prevalence: best fitting standard regression model = cubic model (with point of inflection identified by second order derivatives in 1993 (year 20)), best fitting piecewise model = quadratic model with two breakpoints in 1994 (year 21) and 2002 (year 29); Ex-smoking prevalence: best fitting standard regression model = cubic model (with point of inflection identified by second order derivatives in 1990 (year 17)), best fitting piecewise model = quadratic model with two breakpoints in 1996 (year 23) and 2012 (year 39); Quit ratio: best fitting standard regression model = cubic model (with point of inflection identified by second order derivatives in 2001 (year 28)), best fitting piecewise model = quadratic model with two breakpoints in 1996 (year 23) and 2013 (year 40); NA = not applicable; Evidence ratios (EV): smoking - best fitting standard model versus linear model ER=3.286e+10, best fitting piecewise model versus linear model ER=496208161; Ever smoking - best fitting standard model versus linear model ER=596805, best fitting piecewise model versus linear model ER=8.702e+12; Ex smoking - best fitting standard model versus linear model ER=6.688e+10, best fitting piecewise model versus linear model ER=3.559e+15; Quit Ratio - best fitting standard model versus linear model ER=410095133, best fitting piecewise model versus linear model ER=1.323e+11

**Supplementary Table 5: Correlation between year and change in smoking prevalence from the previous year**

| Year | Smoking prevalence difference<br>$t_n - t_{n+1}$ |
|------|--------------------------------------------------|
| 1973 | 2                                                |
| 1974 | 3.8                                              |
| 1976 | 1.4                                              |
| 1978 | 0.8                                              |
| 1980 | 4.1                                              |
| 1982 | 1.2                                              |
| 1984 | 1.2                                              |
| 1986 | 1.2                                              |
| 1988 | 1.7                                              |
| 1990 | 1.6                                              |
| 1992 | 1.8                                              |
| 1994 | -1.2                                             |
| 1996 | 1                                                |
| 1998 | 0.1                                              |
| 2000 | 0                                                |
| 2001 | 1.2                                              |
| 2002 | -0.1                                             |
| 2003 | 1.3                                              |
| 2004 | 0.7                                              |
| 2005 | 2                                                |
| 2006 | 1.1                                              |
| 2007 | -0.4                                             |
| 2008 | -0.1                                             |
| 2009 | 0.4                                              |
| 2010 | 0.5                                              |
| 2011 | 0.8                                              |
| 2012 | 1.1                                              |
| 2013 | 0.4                                              |
| 2014 | 1.1                                              |
| 2015 | 1.4                                              |

There was a significant negative rank order correlation ( $r=-0.50$ ; 95%CI -0.73 to -0.17,  $p=0.005$ ) between the annual change in smoking prevalence (i.e.  $t_n - t_{n+1}$ ) and year, which suggests that the decline in overall prevalence has changed significantly over time.

Supplementary Figure 1: Raw and fitted prevalence from the assessed regression models

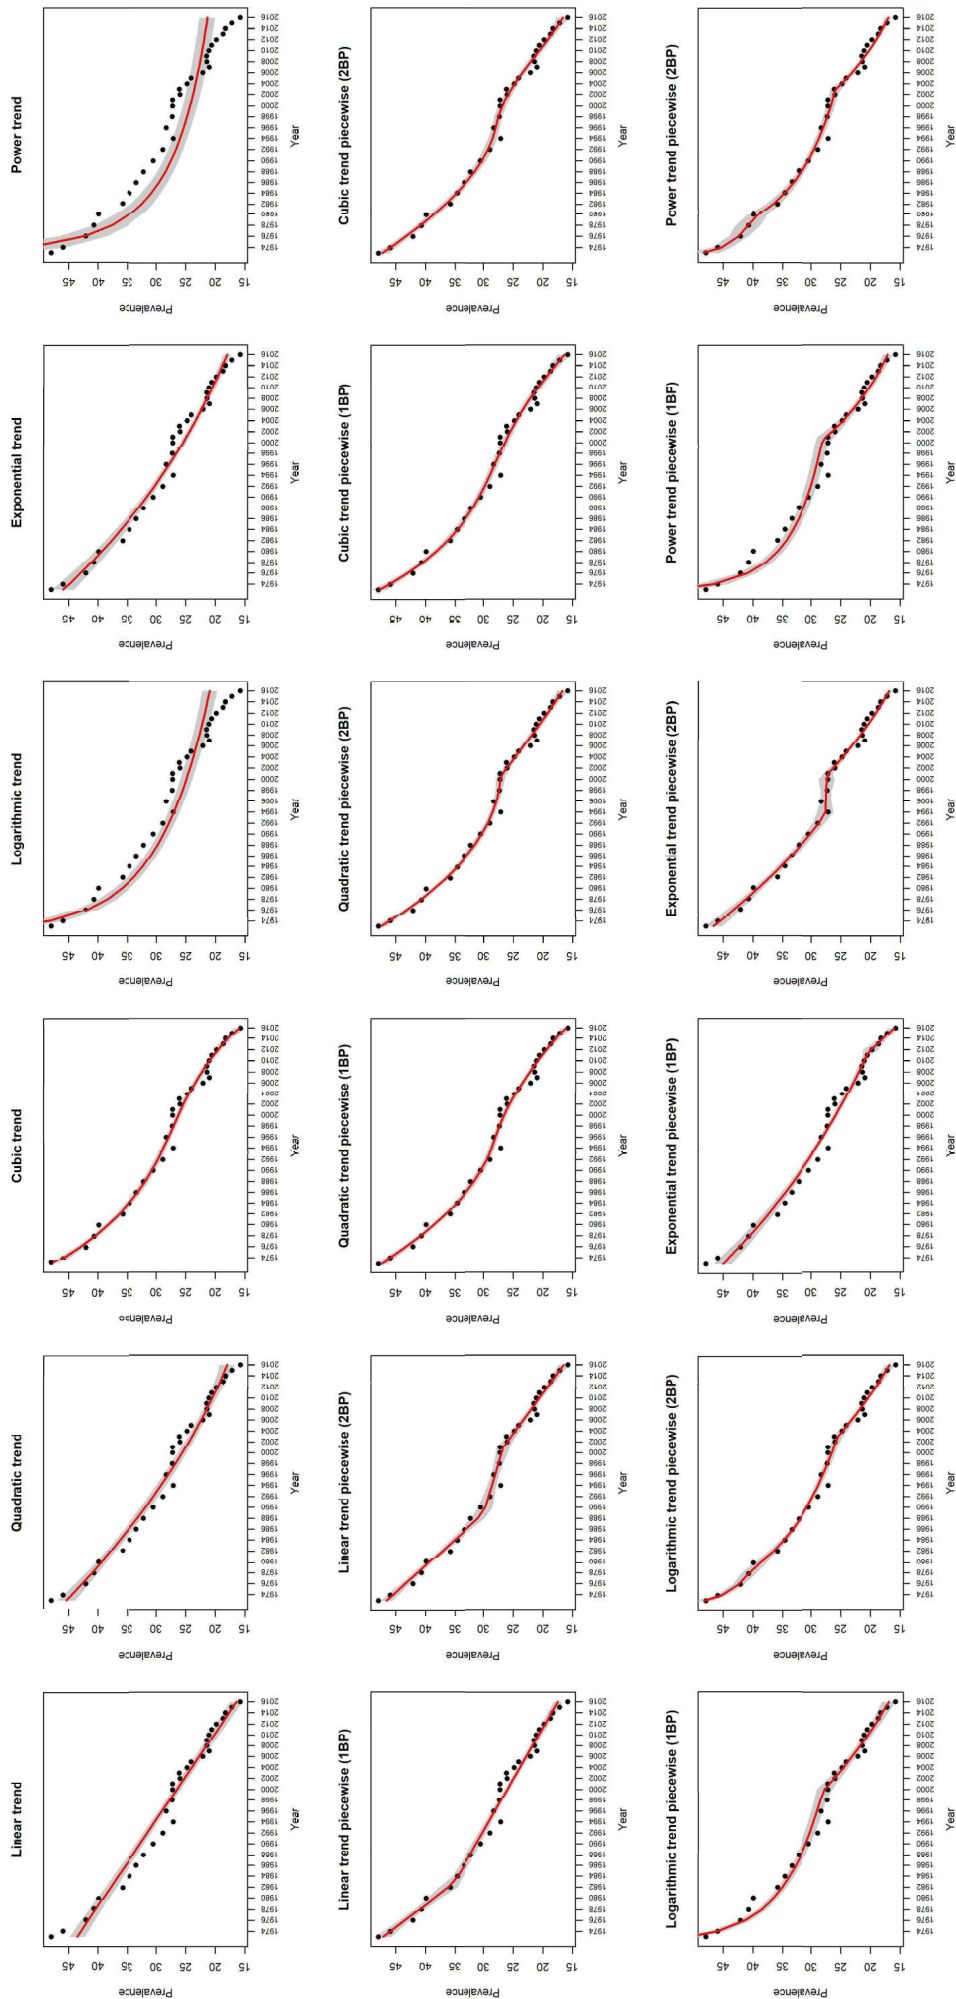

Supplementary Figure 2: Raw and fitted ever smoking prevalence from the assessed regression models

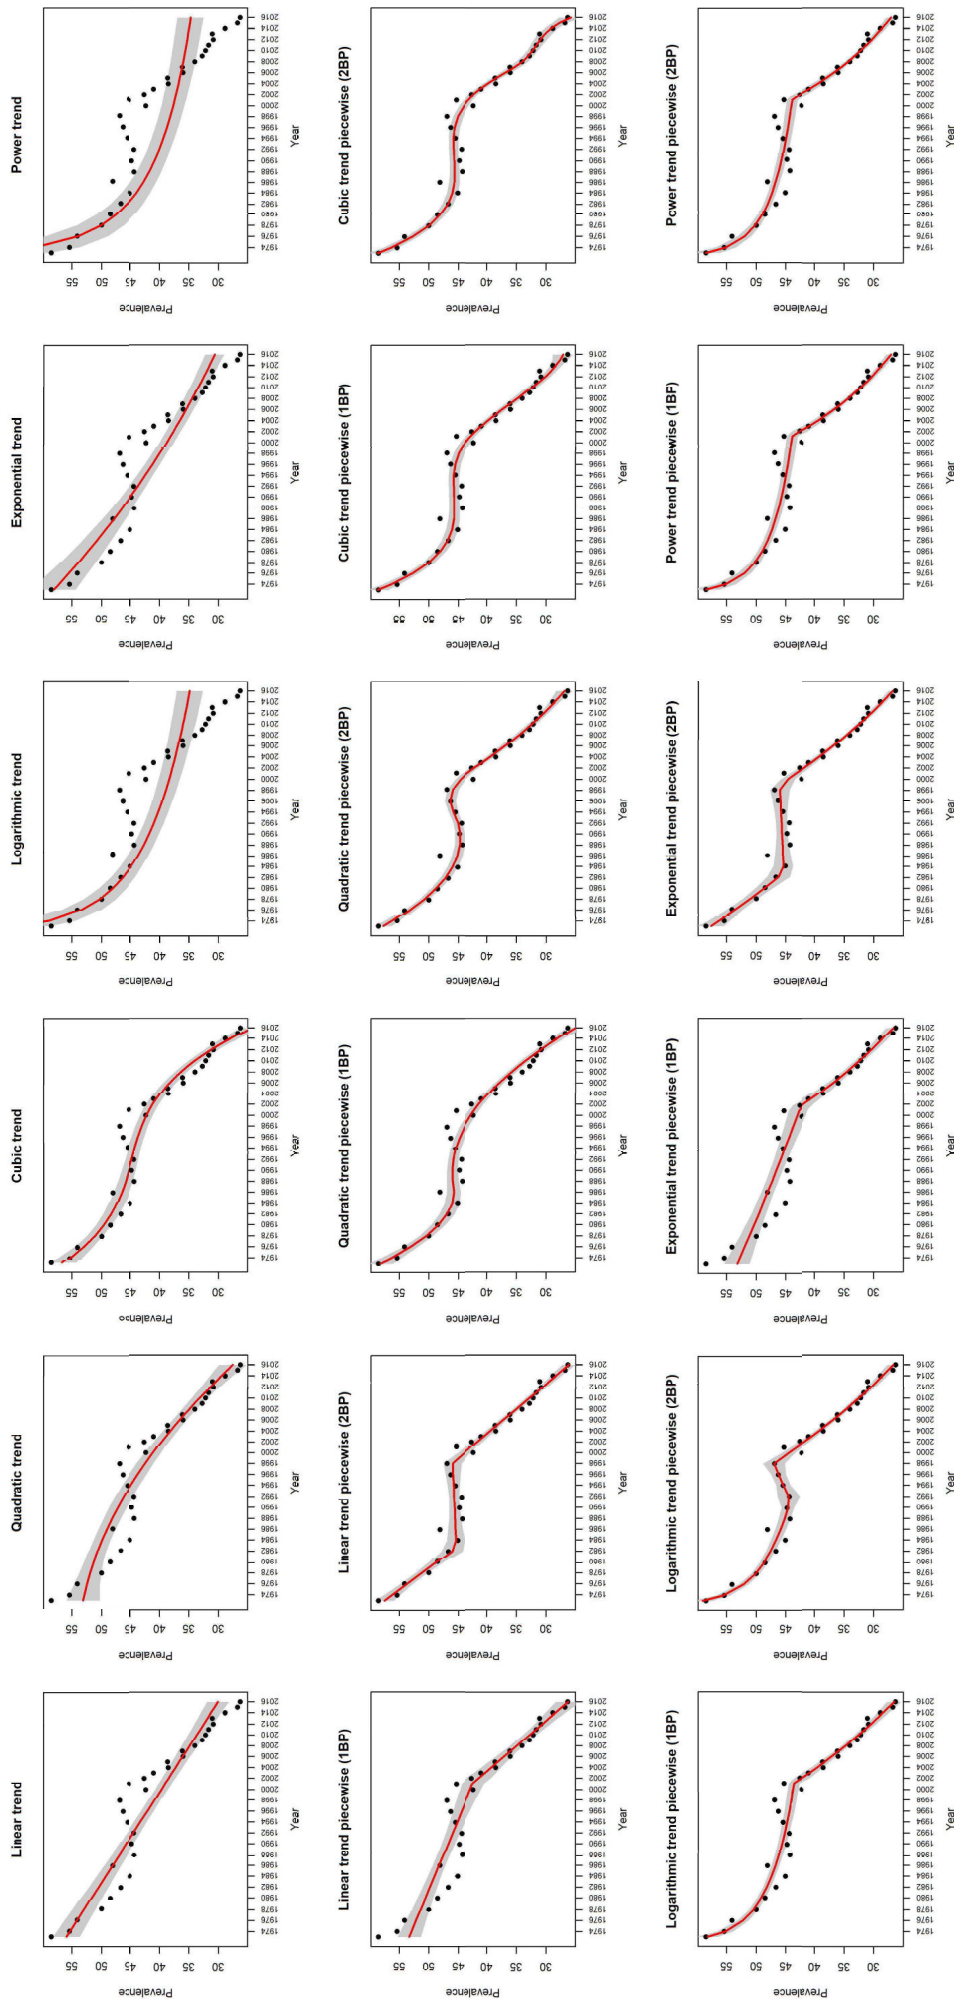

Supplementary Figure 3: Raw and fitted prevalence from the assessed regression models

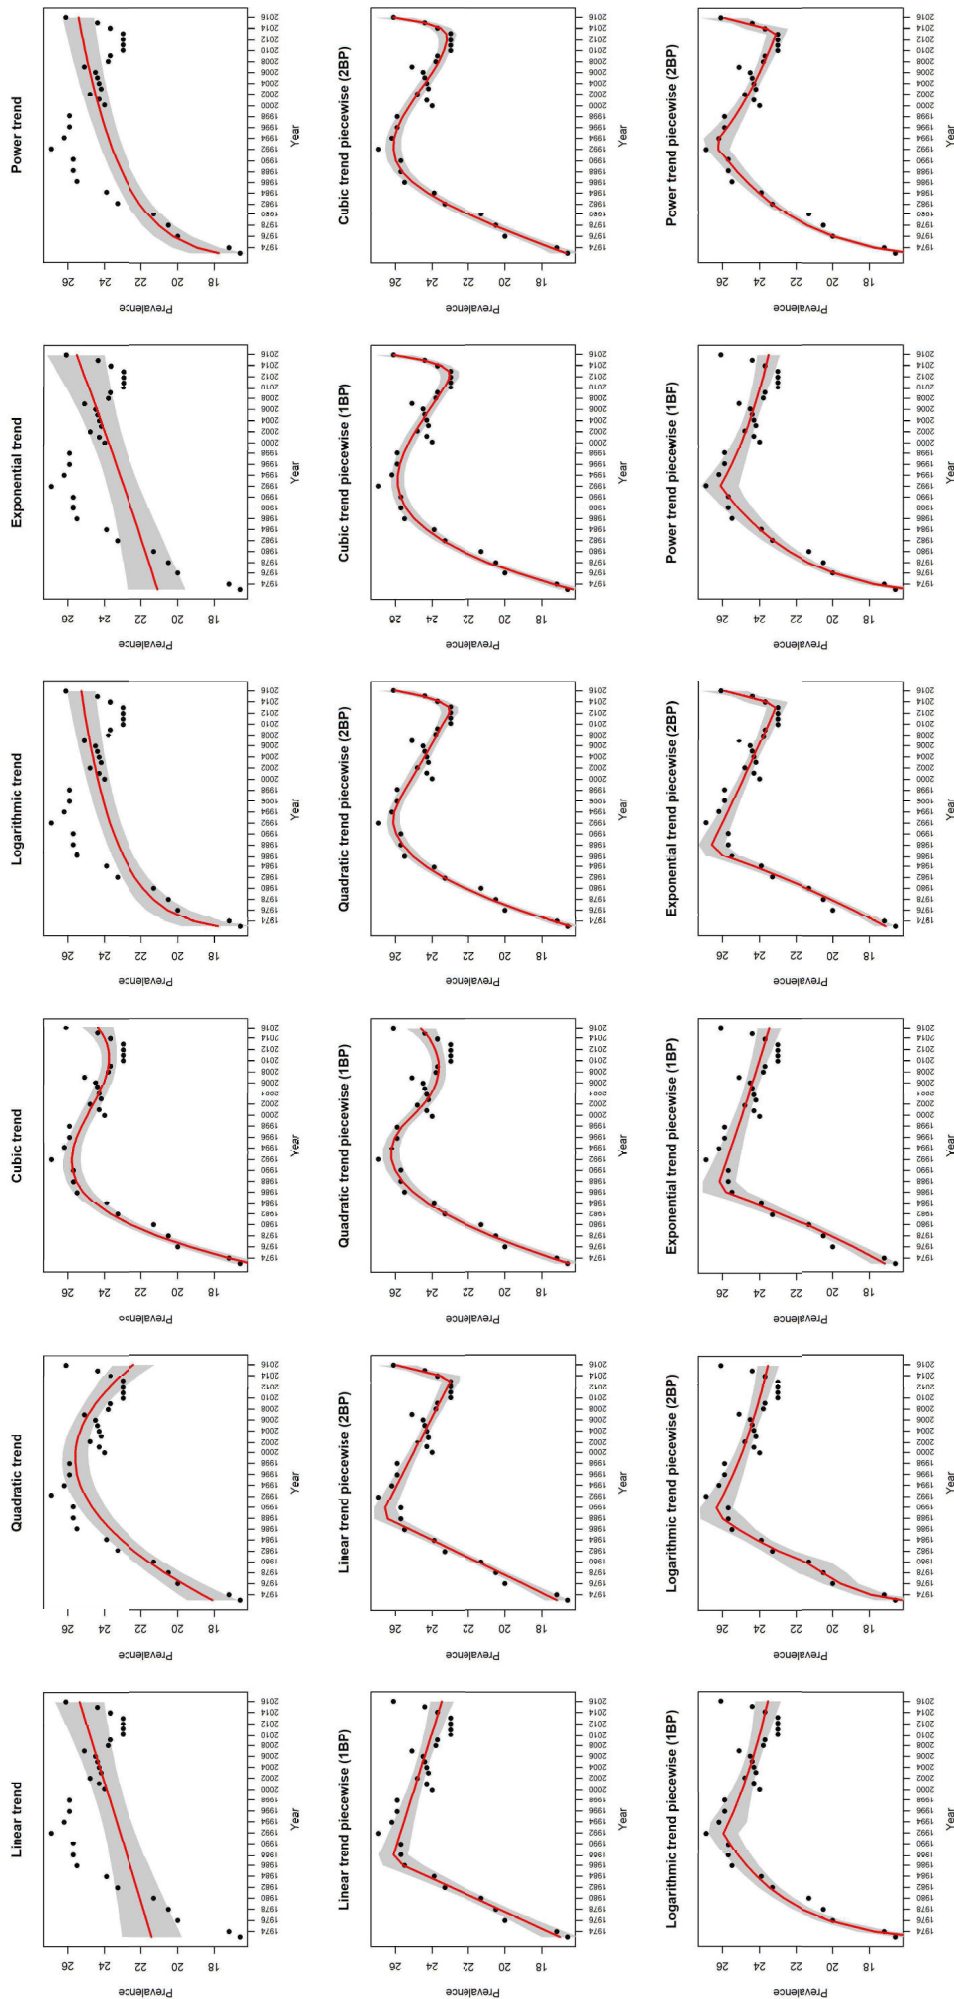



Supplementary Figure 4: Raw and fitted quit ratios from the assessed regression models

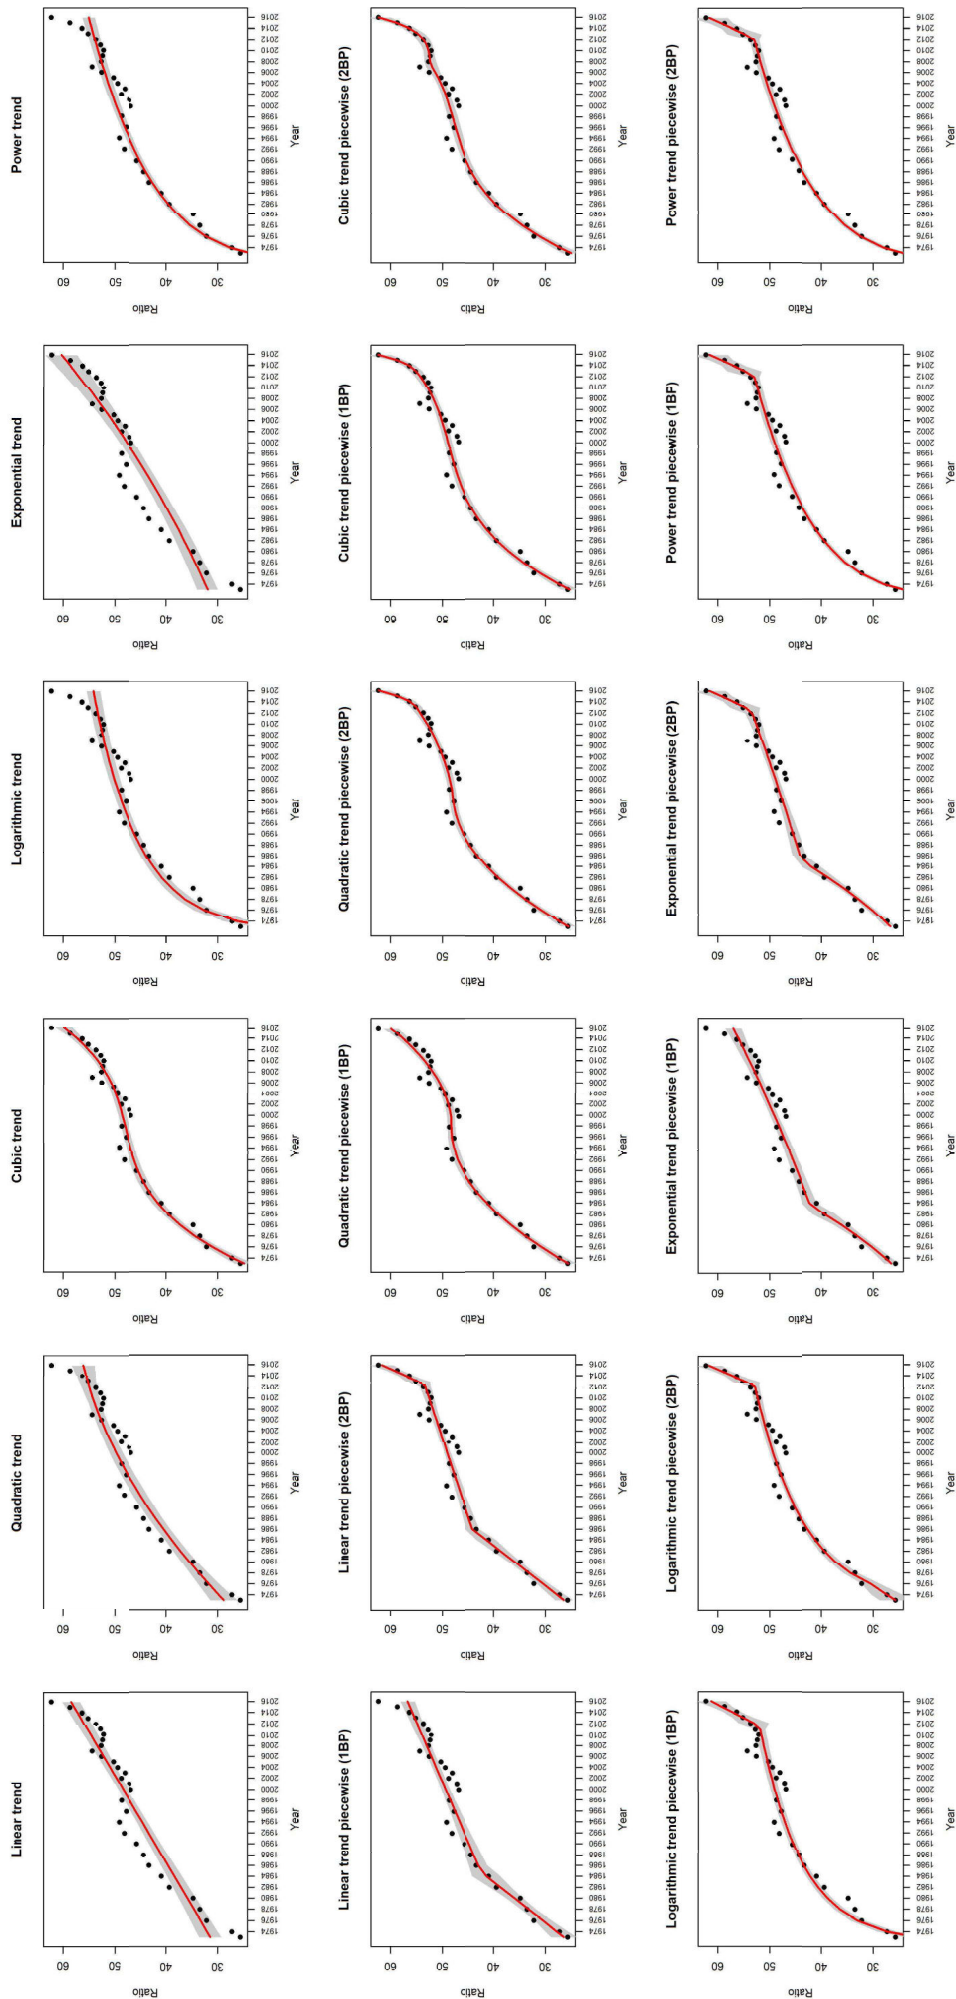

Supplement: thoraxjnl-2018-212740supp001.pdf [file thoraxjnl-2018-212740supp001.pdf]
